# Supplementary material for: Mutation-specific non-canonical pathway of PTEN as a distinct therapeutic target for glioblastoma
Source: PubMed Central journal article supplement (PMC8027895; doi:10.1038/s41419-021-03657-0), 2021-04-07

## P090 (PTEN-null)

|         |    |    |      |       |       |
|---------|----|----|------|-------|-------|
| NT      | +  | -- | --   | --    | --    |
| PTEN-V5 | -- | +  | +    | +     | +     |
| Alter.  |    | WT | H93Y | C124S | R130Q |

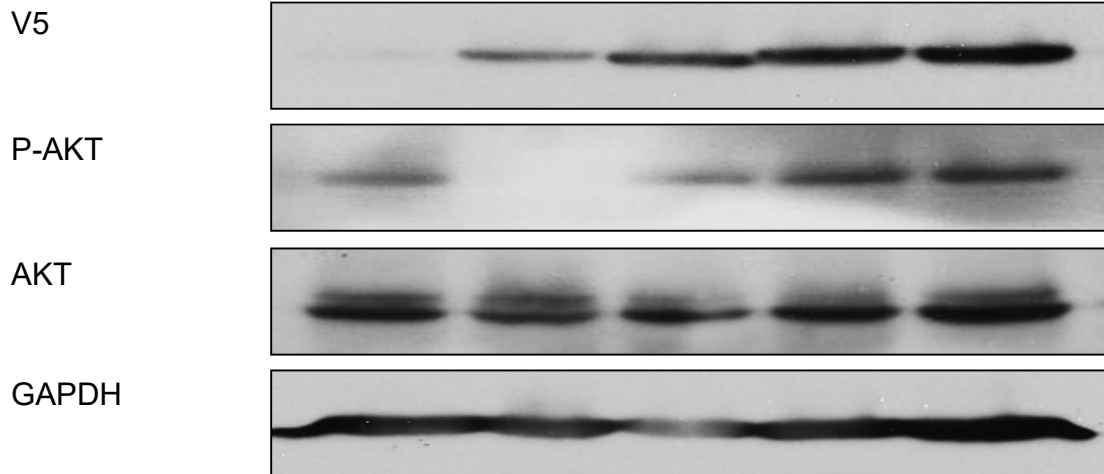

Supplement: 41419_2021_3657_MOESM5_ESM.pdf [file 41419_2021_3657_MOESM5_ESM.pdf]
