# Supplementary material for: Mutation-specific non-canonical pathway of PTEN as a distinct therapeutic target for glioblastoma
Source: PubMed Central journal article supplement (PMC8027895; doi:10.1038/s41419-021-03657-0), 2021-04-07

Survival probability (OS)

1.00  
0.75  
0.50  
0.25  
0.00

U87-NT  
U87-R173C

P-value=0.033  
(log-rank test)

0 10 20 30

Time (days)

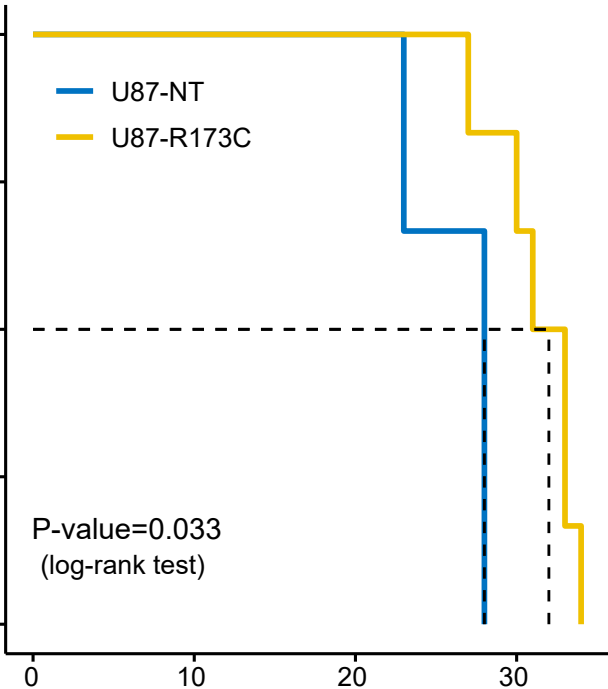

Supplement: 41419_2021_3657_MOESM7_ESM.pdf [file 41419_2021_3657_MOESM7_ESM.pdf]
