# Supplementary material for: Mutation-specific non-canonical pathway of PTEN as a distinct therapeutic target for glioblastoma
Source: PubMed Central journal article supplement (PMC8027895; doi:10.1038/s41419-021-03657-0), 2021-04-07

# P089 (PTEN-null)

NT (del)

H93Y

C124S

R130Q

Day 0

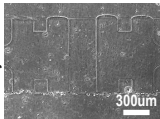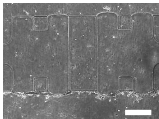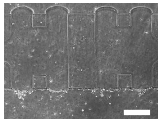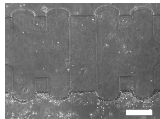

Day 4

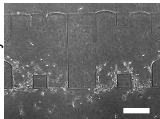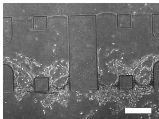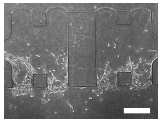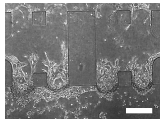

Supplement: 41419_2021_3657_MOESM9_ESM.pdf [file 41419_2021_3657_MOESM9_ESM.pdf]
