# Supplementary material for: Mutation-specific non-canonical pathway of PTEN as a distinct therapeutic target for glioblastoma
Source: PubMed Central journal article supplement (PMC8027895; doi:10.1038/s41419-021-03657-0), 2021-04-07

PTEN DAPI

P087 (endogenous H93Y)

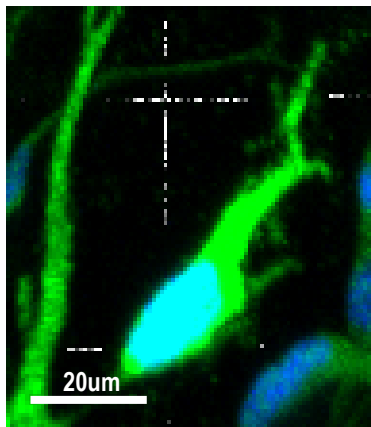

F-actin DAPI

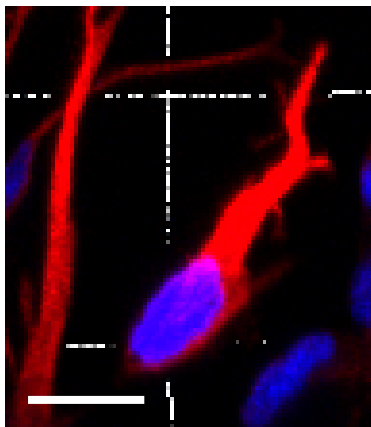

P045 (endogenous R130Q)

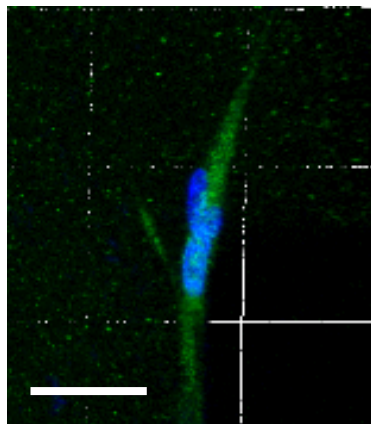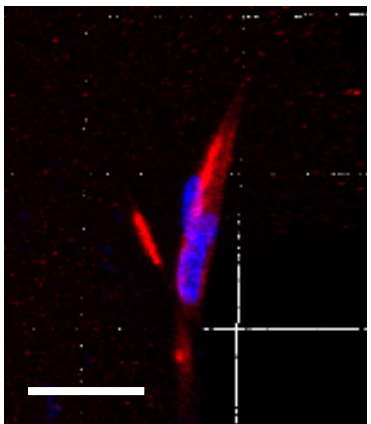

Supplement: 41419_2021_3657_MOESM10_ESM.pdf [file 41419_2021_3657_MOESM10_ESM.pdf]
