# Supplementary material for: Mutation-specific non-canonical pathway of PTEN as a distinct therapeutic target for glioblastoma
Source: PubMed Central journal article supplement (PMC8027895; doi:10.1038/s41419-021-03657-0), 2021-04-07
Supplement: 41419_2021_3657_MOESM14_ESM.pdf [file 41419_2021_3657_MOESM14_ESM.pdf]

| Accession | Description                                                                                                                         | # Peptides |      |       | # PSM |     |      | Coverage |       |        | Score  |        |        | Gene ontology (biological process) | GO Gene ontology (molecular function) | Gene ontology (cellular component) |        |                                                                                                                                                                                                                                                                                                                                                                                                                                                                                                                                                                                                                                                                                                                                                                                                                                                                                                                                                                                                                                                                                                                                                                                                                                                                                                                                                  |                                                                                                                                                                                                                                                                                                                                                                                                                                      |                                                                                                                                                                                                                                                                                                                                                                                                                                                                                                                                                                                                                                                       |
|-----------|-------------------------------------------------------------------------------------------------------------------------------------|------------|------|-------|-------|-----|------|----------|-------|--------|--------|--------|--------|------------------------------------|---------------------------------------|------------------------------------|--------|--------------------------------------------------------------------------------------------------------------------------------------------------------------------------------------------------------------------------------------------------------------------------------------------------------------------------------------------------------------------------------------------------------------------------------------------------------------------------------------------------------------------------------------------------------------------------------------------------------------------------------------------------------------------------------------------------------------------------------------------------------------------------------------------------------------------------------------------------------------------------------------------------------------------------------------------------------------------------------------------------------------------------------------------------------------------------------------------------------------------------------------------------------------------------------------------------------------------------------------------------------------------------------------------------------------------------------------------------|--------------------------------------------------------------------------------------------------------------------------------------------------------------------------------------------------------------------------------------------------------------------------------------------------------------------------------------------------------------------------------------------------------------------------------------|-------------------------------------------------------------------------------------------------------------------------------------------------------------------------------------------------------------------------------------------------------------------------------------------------------------------------------------------------------------------------------------------------------------------------------------------------------------------------------------------------------------------------------------------------------------------------------------------------------------------------------------------------------|
|           |                                                                                                                                     | WT         | H93Y | C124S | R130Q | WT  | H93Y | C124S    | R130Q | WT     | H93Y   | C124S  | R130Q  |                                    |                                       |                                    | WT     | H93Y                                                                                                                                                                                                                                                                                                                                                                                                                                                                                                                                                                                                                                                                                                                                                                                                                                                                                                                                                                                                                                                                                                                                                                                                                                                                                                                                             | C124S                                                                                                                                                                                                                                                                                                                                                                                                                                | R130Q                                                                                                                                                                                                                                                                                                                                                                                                                                                                                                                                                                                                                                                 |
| P08670    | Vimentin OS=Homo sapiens GN=VIM PE=1 SV=4 - [VIME_HUMAN]                                                                            | 22         | 28   | 26    | 28    | 171 | 276  | 243      | 367   | 48.07% | 60.52% | 52.79% | 57.51% | 445.96                             | 686.93                                | 592.59                             | 933.78 | apoptotic process [GO:0006915]; astrocyte development [GO:0014002]; Bergmann glial cell differentiation [GO:0060020]; cellular component disassembly involved in execution phase of apoptosis [GO:0006691]; intermediate filament organization [GO:0045101]; lens fiber cell development [GO:0070307]; movement of cell or subcellular component [GO:0060628]; muscle filament sliding [GO:0030049]; negative regulation of neuron projection development [GO:0010977]; positive regulation of gene expression [GO:0010628]; SMAD protein signal transduction [GO:0060395]; viral process [GO:0016032]                                                                                                                                                                                                                                                                                                                                                                                                                                                                                                                                                                                                                                                                                                                                           | double-stranded RNA binding [GO:0003725]; glycoprotein binding [GO:0019488]; identical protein binding [GO:0042802]; keratin filament binding [GO:1990254]; protein C-terminus binding [GO:0008022]; scarfold protein binding [GO:0097110]; structural constituent of cytoskeleton [GO:0052005]; structural constituent of eye lens [GO:0095212]                                                                                     | cell leading edge [GO:0031252]; cytoplasm [GO:0005737]; cytoskeleton [GO:0005856]; cytosol [GO:0005829]; extracellular vesicular exosome [GO:0070062]; focal adhesion [GO:0005925]; intermediate filament [GO:0005882]; intermediate filament cytoskeleton [GO:0045111]; neuron projection [GO:0043005]; peroxisome [GO:0005777]; plasma membrane [GO:0005886]                                                                                                                                                                                                                                                                                        |
| F6KC23    | Phosphatase and tensin-like protein OS=Homo sapiens PE=4 SV=1 - [F6KC23_HUMAN]                                                      | 7          | 7    | 8     | 7     | 15  | 55   | 30       | 38    | 24.81% | 24.81% | 27.05% | 24.81% | 39.24                              | 141.85                                | 75.18                              | 101.76 | inositol phosphate dephosphorylation [GO:0046855]; negative regulation of cell migration [GO:0030336]; negative regulation of cell proliferation [GO:0008285]; negative regulation of focal adhesion assembly [GO:0051895]; negative regulation of protein kinase B signaling [GO:0051898]; phosphatidylinositol-3,4,5-trisphosphate 3-phosphatase activity [GO:0016314]; phosphatidylinositol-3,4-bisphosphate 3-phosphatase activity [GO:0051800]; phosphatidylinositol dephosphorylation [GO:0046856]; protein tyrosine/serine/threonine phosphatase activity [GO:0008138]; protein tyrosine phosphatase activity [GO:0004725]; regulation of protein stability [GO:0031647]                                                                                                                                                                                                                                                                                                                                                                                                                                                                                                                                                                                                                                                                  | magnesium ion binding [GO:0000287]; phosphatidylinositol-3,4,5-trisphosphate 3-phosphatase activity [GO:0016314]; phosphatidylinositol-3,4-bisphosphate 3-phosphatase activity [GO:0051800]; protein tyrosine/serine/threonine phosphatase activity [GO:0008138]; protein tyrosine phosphatase activity [GO:0004725]                                                                                                                 |                                                                                                                                                                                                                                                                                                                                                                                                                                                                                                                                                                                                                                                       |
| F6KC25    | Phosphatase and tensin-like protein OS=Homo sapiens PE=4 SV=1 - [F6KC25_HUMAN]                                                      | 6          | 7    | 8     | 6     | 14  | 49   | 27       | 29    | 20.10% | 24.81% | 27.05% | 20.10% | 36.54                              | 121.95                                | 67.02                              | 74.17  | inositol phosphate dephosphorylation [GO:0046855]; negative regulation of cell migration [GO:0030336]; negative regulation of cell proliferation [GO:0008285]; negative regulation of focal adhesion assembly [GO:0051895]; negative regulation of protein kinase B signaling [GO:0051898]; phosphatidylinositol-3,4,5-trisphosphate 3-phosphatase activity [GO:0016314]; phosphatidylinositol-3,4-bisphosphate 3-phosphatase activity [GO:0051800]; phosphatidylinositol dephosphorylation [GO:0046856]; protein tyrosine/serine/threonine phosphatase activity [GO:0008138]; protein tyrosine phosphatase activity [GO:0004725]; regulation of protein stability [GO:0031647]                                                                                                                                                                                                                                                                                                                                                                                                                                                                                                                                                                                                                                                                  | magnesium ion binding [GO:0000287]; phosphatidylinositol-3,4,5-trisphosphate 3-phosphatase activity [GO:0016314]; phosphatidylinositol-3,4-bisphosphate 3-phosphatase activity [GO:0051800]; protein tyrosine/serine/threonine phosphatase activity [GO:0008138]; protein tyrosine phosphatase activity [GO:0004725]                                                                                                                 |                                                                                                                                                                                                                                                                                                                                                                                                                                                                                                                                                                                                                                                       |
| P35579    | Myosin-9 OS=Homo sapiens GN=MYH9 PE=1 SV=4 - [MYH9_HUMAN]                                                                           | 5          | 1    | 3     | 6     | 6   | 1    | 5        | 10    | 4.85%  | 0.87%  | 2.60%  | 5.00%  | 16.51                              | 2.67                                  | 14.35                              | 28.21  | actin cytoskeleton reorganization [GO:0031532]; actin-dependent ATPase activity [GO:0030898]; actin filament-based movement [GO:0030048]; actomyosin structure organization [GO:0031032]; angiogenesis [GO:0001525]; ATPase activity [GO:0016887]; axon guidance [GO:0007411]; blood vessel endothelial cell migration [GO:0043534]; cytokinesis [GO:0000910]; ephrin receptor signaling pathway [GO:0048013]; establishment of meiotic spindle localization [GO:0051295]; establishment of T cell polarity [GO:0001768]; integrin-mediated signaling pathway [GO:0007229]; in utero embryonic development [GO:0001701]; leukocyte migration [GO:0050980]; meiotic spindle organization [GO:0000212]; membrane protein ectodomain proteolysis [GO:0006509]; microfilament motor activity [GO:0001046]; monocyte differentiation [GO:0030224]; motor activity [GO:0003774]; myoblast fusion [GO:0007520]; negative regulation of actin filament severing [GO:1903919]; phagocytosis, engulfment [GO:0006911]; platelet aggregation [GO:0070527]; platelet formation [GO:0030220]; positive regulation of protein processing in phagocytic vesicle [GO:1903923]; protein transport [GO:0015031]; regulation of cell shape [GO:0008360]; termination of G-protein coupled receptor signaling pathway [GO:0038032]; uropod organization [GO:0032796] | actin binding [GO:0003779]; actin-dependent ATPase activity [GO:0030898]; actin filament binding [GO:0051015]; ADP binding [GO:0043531]; ATPase activity [GO:0016887]; ATP binding [GO:0005524]; microfilament motor activity [GO:0001046]; motor activity [GO:0003774]; poly(A) RNA binding [GO:0044822]; protein anchor [GO:0043495]; protein domain specific binding [GO:0019904]; protein homodimerization activity [GO:0042803] | actin cytoskeleton [GO:0015629]; actomyosin [GO:0042641]; actomyosin contractile ring [GO:0005826]; cell-cell adherens junction [GO:0005913]; cell leading edge [GO:0031252]; cleavage furrow [GO:0032154]; cytoplasm [GO:0005737]; cytosol [GO:0005829]; extracellular vesicular exosome [GO:0070062]; immunological synapse [GO:0001772]; membrane [GO:0016020]; myosin II complex [GO:0016460]; myosin II filament [GO:0097513]; neuromuscular junction [GO:0031594]; nucleus [GO:0005634]; plasma membrane [GO:0005886]; protein complex [GO:0042344]; ruffle [GO:0001726]; spindle [GO:00005819]; stress fiber [GO:0001725]; uropod [GO:0001931] |
| Q8NS32    | TUBA1C protein OS=Homo sapiens GN=TUBA1C PE=2 SV=1 - [Q8NS32_HUMAN]                                                                 | 4          | 3    | 3     | 6     | 5   | 3    | 4        | 9     | 17.54% | 13.85% | 13.85% | 24.92% | 13.46                              | 8.82                                  | 10.13                              | 22.34  | GTPase activity [GO:0003924]; microtubule-based process [GO:0007017]; protein polymerization [GO:0051258]                                                                                                                                                                                                                                                                                                                                                                                                                                                                                                                                                                                                                                                                                                                                                                                                                                                                                                                                                                                                                                                                                                                                                                                                                                        | GTPase activity [GO:0003924]; GTP binding [GO:0005525]; structural constituent of cytoskeleton [GO:0005200]                                                                                                                                                                                                                                                                                                                          | cytoplasm [GO:0005737]; microtubule [GO:0005874]                                                                                                                                                                                                                                                                                                                                                                                                                                                                                                                                                                                                      |
| E9PH82    | Protein FAM98A OS=Homo sapiens GN=FAM98A PE=2 SV=1 - [E9PH82_HUMAN]                                                                 | 2          | 3    | 1     | 2     | 2   | 4    | 2        | 3     | 12.50% | 16.99% | 4.81%  | 9.29%  | 5.12                               | 9.32                                  | 4.81                               | 6.7    | brain development [GO:0007420]; cellular amino acid biosynthetic process [GO:0008652]; cellular nitrogen compound metabolic process [GO:0034641]; G1 to G0 transition [GO:0070314]; gamma-aminobutyric acid metabolic process [GO:0009448]; glial cell development [GO:0021782]; glutamine metabolic process [GO:0006541]; glycine metabolic process [GO:0006544]; L-serine biosynthetic process [GO:0006564]; neural tube development [GO:0021915]; neuron projection development [GO:0031175]; phosphoglycerate dehydrogenase activity [GO:0004617]; regulation of gene expression [GO:0010468]; small molecule metabolic process [GO:0044281]; spinal cord development [GO:0021510]; taurine metabolic process [GO:0019530]; threonine metabolic process [GO:0006566]                                                                                                                                                                                                                                                                                                                                                                                                                                                                                                                                                                         | electron carrier activity [GO:0009055]; NAD binding [GO:0051287]; phosphoglycerate dehydrogenase activity [GO:0004617]                                                                                                                                                                                                                                                                                                               | cytosol [GO:0005829]; extracellular vesicular exosome [GO:0070062]                                                                                                                                                                                                                                                                                                                                                                                                                                                                                                                                                                                    |
| A8MU81    | Tubulin alpha-4A chain OS=Homo sapiens GN=TUBA4A PE=2 SV=1 - [A8MU81_HUMAN]                                                         | 1          | 1    | 2     | 1     | 1   | 3    | 4        | 9     | 4.16%  | 2.31%  | 6.24%  | 2.16   | 2.89                               | 6.95                                  |                                    |        | aging [GO:0007568]; carbohydrate metabolic process [GO:0005975]; gluconeogenesis [GO:0006094]; glucose metabolic process [GO:0006006]; glycolytic process [GO:0006096]; pathogenesis [GO:0009405]; phosphopyruvate hydratase activity [GO:0004634]; response to drug [GO:0042493]; skeletal muscle tissue regeneration [GO:0043403]; small molecule metabolic process [GO:0044281]                                                                                                                                                                                                                                                                                                                                                                                                                                                                                                                                                                                                                                                                                                                                                                                                                                                                                                                                                               | magnesium ion binding [GO:0000287]; phosphopyruvate hydratase activity [GO:0004634]                                                                                                                                                                                                                                                                                                                                                  | cytoplasm [GO:0005737]; cytosol [GO:0005829]; extracellular space [GO:0005615]; extracellular vesicular exosome [GO:0070062]; phosphopyruvate hydratase complex [GO:0000015]; plasma membrane [GO:0005886]                                                                                                                                                                                                                                                                                                                                                                                                                                            |
| 8721G4    | cDNA FL161601, highly similar to Inosine-5'-monophosphate dehydrogenase 2 (EC 1.1.1.205) OS=Homo sapiens PE=2 SV=1 - [8721G4_HUMAN] | 1          | 1    | 1     | 2     | 1   | 1    | 2        | 2     | 3.08%  | 3.08%  | 3.08%  | 7.00%  | 2.43                               | 2.02                                  | 2.41                               | 4.74   | oxidoreductase activity [GO:0016491]                                                                                                                                                                                                                                                                                                                                                                                                                                                                                                                                                                                                                                                                                                                                                                                                                                                                                                                                                                                                                                                                                                                                                                                                                                                                                                             | oxidoreductase activity [GO:0016491]                                                                                                                                                                                                                                                                                                                                                                                                 |                                                                                                                                                                                                                                                                                                                                                                                                                                                                                                                                                                                                                                                       |
| P13929    | Isoform 3 of Beta-enolase OS=Homo sapiens GN=ENO3 - [ENO3_HUMAN]                                                                    | 2          | 2    | 1     | 2     | 2   | 2    | 2        | 2     | 8.44%  | 8.44%  | 4.60%  | 5.36   | 4.85                               | 4.81                                  |                                    |        | aging [GO:0007568]; carbohydrate metabolic process [GO:0005975]; gluconeogenesis [GO:0006094]; glucose metabolic process [GO:0006006]; glycolytic process [GO:0006096]; pathogenesis [GO:0009405]; phosphopyruvate hydratase activity [GO:0004634]; response to drug [GO:0042493]; skeletal muscle tissue regeneration [GO:0043403]; small molecule metabolic process [GO:0044281]                                                                                                                                                                                                                                                                                                                                                                                                                                                                                                                                                                                                                                                                                                                                                                                                                                                                                                                                                               | magnesium ion binding [GO:0000287]; phosphopyruvate hydratase activity [GO:0004634]                                                                                                                                                                                                                                                                                                                                                  | cytoplasm [GO:0005737]; cytosol [GO:0005829]; extracellular space [GO:0005615]; extracellular vesicular exosome [GO:0070062]; phosphopyruvate hydratase complex [GO:0000015]; plasma membrane [GO:0005886]                                                                                                                                                                                                                                                                                                                                                                                                                                            |
| Q9UK31    | Pyruvate kinase M2 (Fragment) OS=Homo sapiens PE=4 SV=1 - [Q9UK31_HUMAN]                                                            | 1          | 1    | 1     | 1     | 1   | 1    | 1        | 1     | 39.29% | 39.29% | 39.29% | 39.29% | 2.34                               | 3.06                                  | 2.67                               | 2.8    | glycolytic process [GO:0006096]; pyruvate kinase activity [GO:0004743]                                                                                                                                                                                                                                                                                                                                                                                                                                                                                                                                                                                                                                                                                                                                                                                                                                                                                                                                                                                                                                                                                                                                                                                                                                                                           | magnesium ion binding [GO:0000287]; potassium ion binding [GO:0030955]; pyruvate kinase activity [GO:0004743]                                                                                                                                                                                                                                                                                                                        |                                                                                                                                                                                                                                                                                                                                                                                                                                                                                                                                                                                                                                                       |
| B4DVQ0    | cDNA FLJ58286, highly similar to Actin, cytoplasmic 2 OS=Homo sapiens PE=2 SV=1 - [B4DVQ0_HUMAN]                                    | 1          | 1    | 2     | 2     | 1   | 3    | 3        | 3     | 11.11% | 3.00%  | 10.21% | 5.19   | 2.61                               | 6.46                                  |                                    |        | ATP binding [GO:0005524]                                                                                                                                                                                                                                                                                                                                                                                                                                                                                                                                                                                                                                                                                                                                                                                                                                                                                                                                                                                                                                                                                                                                                                                                                                                                                                                         |                                                                                                                                                                                                                                                                                                                                                                                                                                      |                                                                                                                                                                                                                                                                                                                                                                                                                                                                                                                                                                                                                                                       |
| B3KML9    | cDNA FL11352 fis, clone HEMBA100020, highly similar to Tubulin beta-2C chain OS=Homo sapiens PE=2 SV=1 - [B3KML9_HUMAN]             | 5          | 4    | 5     | 4     | 5   | 4    | 5        | 4     | 13.35% | 10.83% | 12.3   | 8.44   | 8.44                               |                                       |                                    |        | GTPase activity [GO:0003924]; microtubule-based process [GO:0007017]; protein polymerization [GO:0051258]                                                                                                                                                                                                                                                                                                                                                                                                                                                                                                                                                                                                                                                                                                                                                                                                                                                                                                                                                                                                                                                                                                                                                                                                                                        | GTPase activity [GO:0003924]; GTP binding [GO:0005525]; structural constituent of cytoskeleton [GO:0005200]                                                                                                                                                                                                                                                                                                                          | microtubule [GO:0005874]                                                                                                                                                                                                                                                                                                                                                                                                                                                                                                                                                                                                                              |
| Q5T8M8    | Actin, alpha skeletal muscle OS=Homo sapiens GN=ACTA1 PE=2 SV=1 - [Q5T8M8_HUMAN]                                                    | 2          | 1    | 1     | 2     | 1   | 2    | 1        | 2     | 13.59% | 3.48%  | 5.57%  | 5.37   | 2.61                               | 4.14                                  |                                    |        |                                                                                                                                                                                                                                                                                                                                                                                                                                                                                                                                                                                                                                                                                                                                                                                                                                                                                                                                                                                                                                                                                                                                                                                                                                                                                                                                                  |                                                                                                                                                                                                                                                                                                                                                                                                                                      |                                                                                                                                                                                                                                                                                                                                                                                                                                                                                                                                                                                                                                                       |
| A8K854    | HCG1983504, isoform CRA_f OS=Homo sapiens GN=TUBB3 PE=2 SV=1 - [A8K854_HUMAN]                                                       | 3          | 2    | 3     | 2     | 3   | 2    | 3        | 2     | 8.47%  | 5.82%  | 7.14   | 4.26   |                                    |                                       |                                    |        |                                                                                                                                                                                                                                                                                                                                                                                                                                                                                                                                                                                                                                                                                                                                                                                                                                                                                                                                                                                                                                                                                                                                                                                                                                                                                                                                                  |                                                                                                                                                                                                                                                                                                                                                                                                                                      |                                                                                                                                                                                                                                                                                                                                                                                                                                                                                                                                                                                                                                                       |
| H0Y839    | Heterogeneous nuclear ribonucleoprotein H (Fragment) OS=Homo sapiens GN=HNRNPH1 PE=4 SV=1 - [H0Y839_HUMAN]                          | 2          | 1    | 1     | 1     | 2   | 1    | 1        | 2     | 12.27% | 6.14%  | 6.14%  | 6.14%  | 5.29                               | 2.2                                   | 3.37                               | 5.65   | nucleic acid binding [GO:0003676]; nucleotide binding [GO:0000166]                                                                                                                                                                                                                                                                                                                                                                                                                                                                                                                                                                                                                                                                                                                                                                                                                                                                                                                                                                                                                                                                                                                                                                                                                                                                               |                                                                                                                                                                                                                                                                                                                                                                                                                                      |                                                                                                                                                                                                                                                                                                                                                                                                                                                                                                                                                                                                                                                       |
| K7EK77    | ATP synthase subunit alpha, mitochondrial (Fragment) OS=Homo sapiens GN=ATP5A1 PE=2 SV=1 - [K7EK77_HUMAN]                           | 2          | 1    | 2     | 1     | 1   | 2    | 1        | 1     | 13.04% | 5.80%  | 4.48   | 2.24   |                                    |                                       |                                    |        | ATP metabolic process [GO:0046034]; lipid metabolic process [GO:0006629]; proton-transporting ATP synthase activity, rotational mechanism [GO:0046933]                                                                                                                                                                                                                                                                                                                                                                                                                                                                                                                                                                                                                                                                                                                                                                                                                                                                                                                                                                                                                                                                                                                                                                                           | ATP binding [GO:0005524]; proton-transporting ATP synthase activity, rotational mechanism [GO:0046933]                                                                                                                                                                                                                                                                                                                               | mitochondrial inner membrane [GO:0005743]                                                                                                                                                                                                                                                                                                                                                                                                                                                                                                                                                                                                             |
| P06733    | Alpha-enolase OS=Homo sapiens GN=ENO1 PE=1 SV=2 - [ENO1_HUMAN]                                                                      | 3          | 1    | 1     | 3     | 1   | 2    | 1        | 2     | 13.13% | 4.15%  | 4.15%  | 8.41   | 2.23                               | 4.81                                  |                                    |        | carbohydrate metabolic process [GO:0005975]; gluconeogenesis [GO:0006094]; glucose metabolic process [GO:0006006]; glycolytic process [GO:0006096]; negative regulation of cell growth [GO:0030308]; negative regulation of transcription, DNA-templated [GO:0045892]; negative regulation of transcription from RNA polymerase II promoter [GO:0000122]; pathogenesis [GO:0009405]; phosphopyruvate hydratase activity [GO:0004634]; response to virus [GO:0009615]; sequence-specific DNA binding transcription factor activity [GO:0003700]; small molecule metabolic process [GO:0044281]; transcription, DNA-templated [GO:0006351]; transcription corepressor activity [GO:0003714]                                                                                                                                                                                                                                                                                                                                                                                                                                                                                                                                                                                                                                                        | DNA binding [GO:0003677]; GTPase binding [GO:0051020]; magnesium ion binding [GO:0000287]; phosphopyruvate hydratase activity [GO:0004634]; poly(A) RNA binding [GO:0044822]; sequence-specific DNA binding transcription factor activity [GO:0003700]; transcription corepressor activity [GO:0003714]                                                                                                                              | cytoplasm [GO:0005737]; cytosol [GO:0005829]; extracellular space [GO:0005615]; extracellular vesicular exosome [GO:0070062]; M band [GO:0031430]; membrane [GO:0016020]; nucleus [GO:0005634]; phosphopyruvate hydratase complex [GO:0000015]; plasma membrane [GO:0005886]                                                                                                                                                                                                                                                                                                                                                                          |
| B4DE77    | cDNA FLJ5189, highly similar to Tubulin beta-4 chain OS=Homo sapiens PE=2 SV=1 - [B4DE77_HUMAN]                                     | 4          | 1    | 2     | 4     | 1   | 2    | 4        | 2     | 10.02% | 4.16%  | 4.65%  | 9.82   | 2.35                               | 4.33                                  |                                    |        | GTPase activity [GO:0003924]; microtubule-based process [GO:0007017]; protein polymerization [GO:0051258]                                                                                                                                                                                                                                                                                                                                                                                                                                                                                                                                                                                                                                                                                                                                                                                                                                                                                                                                                                                                                                                                                                                                                                                                                                        | GTPase activity [GO:0003924]; GTP binding [GO:0005525]; structural constituent of cytoskeleton [GO:0005200]                                                                                                                                                                                                                                                                                                                          | microtubule [GO:0005874]                                                                                                                                                                                                                                                                                                                                                                                                                                                                                                                                                                                                                              |
| Q9BUJ9    | TUBB protein (Fragment) OS=Homo sapiens GN=TUBB PE=2 SV=1 - [Q9BUJ9_HUMAN]                                                          | 7          | 4    | 1     | 7     | 4   | 1    | 7        | 4     | 25.00% | 13.53% | 4.41%  | 17.51  | 8.41                               | 2.86                                  |                                    |        | GTPase activity [GO:0003924]; protein polymerization [GO:0051258]; spindle assembly [GO:0051225]                                                                                                                                                                                                                                                                                                                                                                                                                                                                                                                                                                                                                                                                                                                                                                                                                                                                                                                                                                                                                                                                                                                                                                                                                                                 | GTPase activity [GO:0003924]; GTP binding [GO:0005525]; structural constituent of cytoskeleton [GO:0005200]                                                                                                                                                                                                                                                                                                                          | microtubule [GO:0005874]; nucleus [GO:0005634]                                                                                                                                                                                                                                                                                                                                                                                                                                                                                                                                                                                                        |
| F6KPG5    | Albumin (Fragment) OS=Homo sapiens PE=2 SV=1 - [F6KPG5_HUMAN]                                                                       | 7          | 1    | 1     | 1     | 12  | 1    | 1        | 1     | 13.16% | 2.56%  | 2.56%  | 2.05%  | 38.5                               | 2.94                                  | 2.95                               | 2.37   | transport [GO:0006810]                                                                                                                                                                                                                                                                                                                                                                                                                                                                                                                                                                                                                                                                                                                                                                                                                                                                                                                                                                                                                                                                                                                                                                                                                                                                                                                           | 0                                                                                                                                                                                                                                                                                                                                                                                                                                    | extracellular space [GO:0005615]                                                                                                                                                                                                                                                                                                                                                                                                                                                                                                                                                                                                                      |
