# Supplementary material for: Mutation-specific non-canonical pathway of PTEN as a distinct therapeutic target for glioblastoma
Source: PubMed Central journal article supplement (PMC8027895; doi:10.1038/s41419-021-03657-0), 2021-04-07
Supplement: 41419_2021_3657_MOESM15_ESM.pdf [file 41419_2021_3657_MOESM15_ESM.pdf]

| sample_ID | PTEN_MUT | mutation_type           | ref     | alt | ref_count | alt_count | VAF         | CDS_mutation       | AA_mutation          |
|-----------|----------|-------------------------|---------|-----|-----------|-----------|-------------|--------------------|----------------------|
| P001      | PTEN     | frameshift_variant      | GT      | G   | 198       | 4         | 0.01980198  | c.166delT          | p.L57Wfs*42          |
| P002      | PTEN     | missense_variant        | A       | G   | 34        | 148       | 0.813186813 | c.65A>G            | p.D22G               |
| P003      | PTEN     | Substitution - Nonsense | C       | A   | 29        | 127       | 0.814102564 | c.176C>A           | p.S59*               |
| P004      | PTEN     | stop_gained             | G       | A   | 112       | 23        | 0.17037037  | c.822G>A           | p.W274*              |
| P005      | PTEN     | frameshift_variant      | C       | CT  | 32        | 196       | 0.859649123 | c.956_957insT      | p.L320Ffs*5          |
| P006      | PTEN     | Substitution - Nonsense | C       | G   | 419       | 23        | 0.052036199 | c.720C>G           | p.Y240*              |
| P007      | PTEN     | inframe_deletion        | AGAT    | A   | 540       | 57        | 0.095477387 | c.591_593delGAT    | p.M198del            |
| P008      | PTEN     | Substitution - Missense | G       | A   | 68        | 275       | 0.801749271 | c.389G>A           | p.R130Q              |
| P009      | PTEN     | frameshift_variant      | GAGAT   | G   | 47        | 259       | 0.846405229 | c.43_46delAGAT     | p.R15fs*8            |
| P010      | PTEN     | Substitution - Missense | G       | A   | 241       | 146       | 0.377260982 | c.389G>A           | p.R130Q              |
| P011      | PTEN     | inframe_deletion        | GTTACCT | G   | 29        | 164       | 0.849740933 | c.739_744delTTACCT | p.L247_P248delinsdel |
| P012      | PTEN     | Substitution - Nonsense | C       | T   | 147       | 247       | 0.626903553 | c.733C>T           | p.Q245*              |
| P013      | PTEN     | splice_donor_variant    | T       | A   | 14        | 151       | 0.915151515 | c.801+2T>A         | NA                   |
| P014      | PTEN     | missense_variant        | G       | T   | 104       | 33        | 0.240875912 | c.212G>T           | p.C71F               |
| P015      | PTEN     | Substitution - Missense | G       | A   | 41        | 385       | 0.903755869 | c.386G>A           | p.G129E              |
| P016      | PTEN     | Substitution - Nonsense | C       | T   | 33        | 198       | 0.857142857 | c.781C>T           | p.Q261*              |
| P017      | PTEN     | missense_variant        | G       | A   | 68        | 196       | 0.742424242 | c.140G>A           | p.R47K               |
| P018      | PTEN     | Substitution - Nonsense | C       | T   | 197       | 40        | 0.168776371 | c.511C>T           | p.Q171*              |
| P019      | PTEN     | Substitution - Nonsense | T       | G   | 216       | 174       | 0.446153846 | c.48T>G            | p.Y16*               |
| P020      | PTEN     | missense_variant        | A       | C   | 294       | 150       | 0.337837838 | c.353A>C           | p.H118P              |
| P021      | PTEN     | Substitution - Nonsense | C       | T   | 165       | 36        | 0.179104478 | c.1003C>T          | p.R335*              |
| P022      | PTEN     | Substitution - Nonsense | C       | A   | 54        | 93        | 0.632653061 | c.195C>A           | p.Y65*               |
| P023      | PTEN     | frameshift_variant      | G       | T   | 194       | 152       | 0.439306358 | c.997G>T           | p.A333S              |
| P024      | PTEN     | frameshift_variant      | CT      | C   | 8         | 298       | 0.973856209 | c.884delT          | p.L295Hfs*12         |
| P025      | PTEN     | frameshift_variant      | T       | TA  | 272       | 153       | 0.36        | c.740_741insA      | p.P248Tfs*5          |
| P026      | PTEN     | inframe_deletion        | ATAT    | A   | 47        | 226       | 0.827838828 | c.147_149delTAT    | p.I50del             |
| P027      | PTEN     | splice_donor_variant    | CTG     | C   | 22        | 12        | 0.352941176 | c.209_209+1delTG   | NA                   |
| P028      | PTEN     | Substitution - Missense | A       | G   | 51        | 82        | 0.616541353 | c.182A>G           | p.H61R               |
| P029      | PTEN     | Substitution - Nonsense | C       | T   | 30        | 144       | 0.827586207 | c.697C>T           | p.R233*              |
| P030      | PTEN     | Substitution - Missense | T       | C   | 148       | 57        | 0.27804878  | c.202T>C           | p.Y68H               |
| P031      | PTEN     | frameshift_variant      | AT      | A   | 172       | 474       | 0.73374613  | c.95delT           | p.I33Lfs*21          |
| P032      | PTEN     | Substitution - Missense | C       | T   | 41        | 620       | 0.937972769 | c.367C>T           | p.H123Y              |
| P033      | PTEN     | missense_variant        | A       | G   | 35        | 15        | 0.3         | c.778A>G           | p.K260E              |
| P034      | PTEN     | Substitution - Missense | T       | C   | 133       | 336       | 0.71641791  | c.644T>C           | p.F215S              |
| P035      | PTEN     | missense_variant        | T       | G   | 454       | 272       | 0.374655647 | c.312T>G           | p.F104L              |
| P036      | PTEN     | Unknown                 | G       | A   | 11        | 16        | 0.592592593 | c.164+1G>A         | NA                   |
| P037      | PTEN     | frameshift_variant      | ACTTT   | A   | 41        | 89        | 0.684615385 | c.956_959delCTTT   | p.T319Kfs*24         |
| P038      | PTEN     | Substitution - Missense | T       | C   | 311       | 17        | 0.051829268 | c.406T>C           | p.C136R              |
| P039      | PTEN     | frameshift_variant      | TCG     | T   | 335       | 172       | 0.339250493 | c.424_425delCG     | p.R142Gfs*37         |
| P040      | PTEN     | missense_variant        | C       | A   | 158       | 205       | 0.564738292 | c.506C>A           | p.P169H              |
| P041      | PTEN     | frameshift_variant      | GTACT   | G   | 75        | 219       | 0.744897959 | c.950_953delTACT   | p.T319*              |
| P042      | PTEN     | Substitution - Missense | T       | C   | 42        | 62        | 0.596153846 | c.406T>C           | p.C136R              |
| P043      | PTEN     | Substitution - Missense | T       | C   | 144       | 100       | 0.409836066 | c.406T>C           | p.C136R              |
| P044      | PTEN     | Substitution - Missense | C       | T   | 74        | 4         | 0.051282051 | c.500C>T           | p.T167I              |
| P045      | PTEN     | Substitution - Missense | G       | A   | 38        | 28        | 0.424242424 | c.389G>A           | p.R130Q              |
| P046      | PTEN     | inframe_deletion        | AGAT    | A   | 30        | 28        | 0.482758621 | c.591_593delGAT    | p.M198del            |
| P047      | PTEN     | frameshift_variant      | T       | TA  | 4         | 38        | 0.904761905 | c.545_546insA      | p.N184Efs*6          |
| P048      | #N/A     | splice_donor_variant    | G       | A   | 25        | 24        | 0.489795918 | c.1026+1G>A        | NA                   |
| P049      | PTEN     | frameshift_variant      | GA      | G   | 173       | 11        | 0.059782609 | c.941delA          | p.E314Dfs*3          |
| P050      | PTEN     | Substitution - Missense | G       | A   | 238       | 50        | 0.173611111 | c.394G>A           | p.G132S              |
| P051      | PTEN     | frameshift_variant      | GTACT   | G   | 89        | 122       | 0.578199052 | c.950_953delTACT   | p.T319*              |
| P052      | PTEN     | Substitution - Missense | T       | C   | 614       | 446       | 0.420754717 | c.401T>C           | p.M134T              |
| P053      | PTEN     | inframe_deletion        | TGTA    | T   | 29        | 20        | 0.408163265 | c.157_159delGTA    | p.V53del             |
| P054      | PTEN     | Substitution - Missense | G       | A   | 150       | 56        | 0.27184466  | c.494G>A           | p.G165E              |
| P055      | PTEN     | Substitution - Missense | G       | A   | 34        | 103       | 0.751824818 | c.212G>A           | p.C71Y               |
| P056      | PTEN     | inframe_deletion        | GTAT    | G   | 416       | 537       | 0.563483736 | c.526_528delTAT    | p.Y176del            |
| P057      | PTEN     | Substitution - Missense | G       | T   | 362       | 130       | 0.264227642 | c.402G>T           | p.M134I              |
| P058      | PTEN     | missense_variant        | C       | T   | 137       | 13        | 0.086666667 | c.1076C>T          | p.A359V              |
| P059      | PTEN     | Substitution - Missense | T       | C   | 1056      | 124       | 0.105084746 | c.401T>C           | p.M134T              |
| P060      | PTEN     | Substitution - Missense | A       | G   | 7         | 32        | 0.820512821 | c.530A>G           | p.Y177C              |

|      |      |                         |      |   |     |     |             |                  |              |
|------|------|-------------------------|------|---|-----|-----|-------------|------------------|--------------|
| P061 | PTEN | inframe_deletion        | GTAT | G | 19  | 13  | 0.40625     | c.526_528delTAT  | p.Y176del    |
| P062 | PTEN | missense_variant        | G    | C | 82  | 110 | 0.572916667 | c.493G>C         | p.G165R      |
| P063 | PTEN | frameshift_variant      | GT   | G | 26  | 13  | 0.333333333 | c.166delT        | p.L57Wfs*42  |
| P064 | PTEN | Substitution - Nonsense | C    | T | 44  | 50  | 0.531914894 | c.1003C>T        | p.R335*      |
| P065 | PTEN | Substitution - Missense | G    | A | 119 | 124 | 0.510288066 | c.394G>A         | p.G132S      |
| P066 | PTEN | Substitution - Missense | C    | T | 84  | 88  | 0.511627907 | c.737C>T         | p.P246L      |
| P067 | PTEN | Substitution - Nonsense | C    | G | 21  | 31  | 0.596153846 | c.540C>G         | p.Y180*      |
| P068 | PTEN | missense_variant        | C    | T | 23  | 84  | 0.785046729 | c.1076C>T        | p.A359V      |
| P069 | PTEN | frameshift_variant      | GTA  | G | 29  | 79  | 0.731481481 | c.950_953delTACT | p.T319*      |
| P070 | PTEN | Substitution - Nonsense | G    | A | 33  | 3   | 0.083333333 | c.822G>A         | p.W274*      |
| P071 | PTEN | frameshift_variant      | GA   | G | 28  | 104 | 0.787878788 | c.896delA        | p.I300Sfs*7  |
| P072 | PTEN | missense_variant        | G    | C | 8   | 16  | 0.666666667 | c.493G>C         | p.G165R      |
| P073 | PTEN | frameshift_variant      | GT   | G | 114 | 4   | 0.033898305 | c.166delT        | p.L57Wfs*42  |
| P074 | PTEN | Substitution - Missense | G    | T | 9   | 43  | 0.826923077 | c.1026G>T        | p.K342N      |
| P075 | PTEN | Substitution - Missense | C    | T | 33  | 29  | 0.467741935 | c.830C>T         | p.T277I      |
| P076 | PTEN | missense_variant        | C    | G | 34  | 12  | 0.260869565 | c.610C>G         | p.P204A      |
| P077 | PTEN | missense_variant        | C    | G | 7   | 165 | 0.959302326 | c.506C>G         | p.P169R      |
| P078 | PTEN | frameshift_variant      | TA   | T | 56  | 32  | 0.363636364 | c.988delA        | p.D331Tfs*13 |
| P079 | PTEN | Substitution - Missense | G    | C | 48  | 94  | 0.661971831 | c.256G>C         | p.A86P       |
| P080 | PTEN | frameshift_variant      | TA   | T | 54  | 6   | 0.1         | c.795delA        | p.K267Rfs*9  |
| P081 | PTEN | frameshift_variant      | TA   | T | 33  | 29  | 0.467741935 | c.988delA        | p.D331Tfs*13 |
| P082 | PTEN | frameshift_variant      | TA   | T | 41  | 49  | 0.544444444 | c.988delA        | p.D331Tfs*13 |
| P083 | PTEN | Substitution - Missense | C    | T | 11  | 65  | 0.855263158 | c.737C>T         | p.P246L      |
| P084 | PTEN | splice_donor_variant    | G    | T | 16  | 14  | 0.466666667 | c.209+1G>T       | NA           |
| P085 | PTEN | Substitution - Missense | T    | C | 69  | 15  | 0.178571429 | c.406T>C         | p.C136R      |
| P086 | PTEN | missense_variant        | G    | T | 72  | 83  | 0.535483871 | c.402G>T         | p.M134I      |
| P087 | PTEN | Substitution - Missense | C    | T | 95  | 70  | 0.424242424 | c.277C>T         | p.H93Y       |
| P088 | PTEN | missense_variant        | T    | C | 16  | 6   | 0.272727273 | c.497T>C         | p.V166A      |
